# Supplementary material for: Carers using assistive technology in dementia care: an explanatory sequential mixed methods study
Source: bioRxiv or medRxiv preprint supplement (doi:10.1101/2021.04.08.21255110), 2021-04-10
Supplement: Supplementary file [file media-2.pdf]

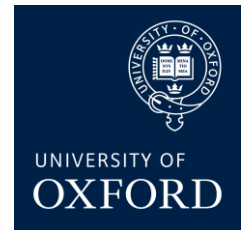

Professor Crispin Jenkinson  
e-mail: [crispin.jenkinson@dph.ox.ac.uk](mailto:crispin.jenkinson@dph.ox.ac.uk)  
Telephone number: 01865 289441  
Dr Michele Peters  
e-mail: [michele.peters@dph.ox.ac.uk](mailto:michele.peters@dph.ox.ac.uk)  
Telephone number: 01865 289428  
Vimal Sriram (Doctoral Student)  
e-mail: [vimal.sriram@dph.ox.ac.uk](mailto:vimal.sriram@dph.ox.ac.uk)  
Telephone number: 01865 743762  
Health Services Research Unit  
Nuffield Department of Population Health  
Richard Doll Building, Old Road Campus, Oxford OX3 7LF

### **PARTICIPANT CONSENT FORM**

CUREC Approval Reference: R57703/RE001

#### **Carers' Experience of Assistive Technology (AT) use in dementia**

**Purpose of Study:**

This research explores the experiences of Assistive Technology use from the perspective of those looking after or helping persons with dementia. The research will look at types of Assistive Technology used and its benefits and dis-advantages. We will explore facilitators or barriers to using Assistive Technology and its impact on burden and well-being.

- |   |                                                                                                                                                                                                                                                      | <i>Please<br/>initial/tick<br/>each box</i> |
|---|------------------------------------------------------------------------------------------------------------------------------------------------------------------------------------------------------------------------------------------------------|---------------------------------------------|
| 1 | I confirm that I have read and understand the information sheet version <u>0.2</u> dated June 2018 for the above study. I have had the opportunity to consider the information, ask questions and have had these answered satisfactorily.            | <input type="checkbox"/>                    |
| 2 | I understand that my participation is voluntary and that I am free to withdraw at any time, without giving any reason, and without any adverse consequences or academic penalty.                                                                     | <input type="checkbox"/>                    |
| 3 | I am over 18 years of age                                                                                                                                                                                                                            | <input type="checkbox"/>                    |
| 4 | I understand that research data collected during the study may be looked at by designated individuals from the University of Oxford where it is relevant to my taking part in this study. I give permission for these individuals to access my data. | <input type="checkbox"/>                    |
| 5 | I understand that this project has been reviewed by, and received ethics clearance through, the University of Oxford Central University Research Ethics Committee.                                                                                   | <input type="checkbox"/>                    |
| 6 | I understand only the researchers directly involved in this study will have access to personal data provided, how the data will be stored and what will happen to the data at the end of the project.                                                | <input type="checkbox"/>                    |

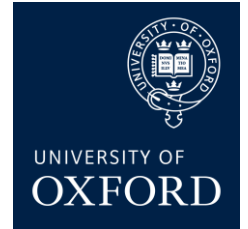

Professor Crispin Jenkinson  
 e-mail: [crispin.jenkinson@dph.ox.ac.uk](mailto:crispin.jenkinson@dph.ox.ac.uk)  
 Telephone number: 01865 289441  
 Dr Michele Peters  
 e-mail: [michele.peters@dph.ox.ac.uk](mailto:michele.peters@dph.ox.ac.uk)  
 Telephone number: 01865 289428  
 Vimal Sriram (Doctoral Student)  
 e-mail: [vimal.sriram@dph.ox.ac.uk](mailto:vimal.sriram@dph.ox.ac.uk)  
 Telephone number: 01865 743762  
 Health Services Research Unit  
 Nuffield Department of Population Health  
 Richard Doll Building, Old Road Campus, Oxford OX3 7LF

- |    |                                                                                                                                                                                                                         |                                                             |
|----|-------------------------------------------------------------------------------------------------------------------------------------------------------------------------------------------------------------------------|-------------------------------------------------------------|
| 7  | I Understand there might be certain circumstances (as outlined in section 7 of the participant information sheet) in which it may be necessary to breach this confidentiality and disclose information to a third party | <input style="width: 60px; height: 25px;" type="checkbox"/> |
| 8  | I understand how this research will be written up and published.                                                                                                                                                        | <input style="width: 60px; height: 25px;" type="checkbox"/> |
| 9  | I understand how to raise a concern or make a complaint.                                                                                                                                                                | <input style="width: 60px; height: 25px;" type="checkbox"/> |
| 10 | I consent to the interview being audio recorded                                                                                                                                                                         | <input style="width: 60px; height: 25px;" type="checkbox"/> |
| 11 | I understand the audio recordings will only be used to transcribe the interview accurately and will be anonymised in research outputs                                                                                   | <input style="width: 60px; height: 25px;" type="checkbox"/> |
| 12 | I give permission to be quoted directly in the research publication suitably anonymised                                                                                                                                 | <input style="width: 60px; height: 25px;" type="checkbox"/> |
| 13 | I agree to take part in the study                                                                                                                                                                                       | <input style="width: 60px; height: 25px;" type="checkbox"/> |

\_\_\_\_\_  
 Name of Participant

\_\_\_\_\_  
 Date

\_\_\_\_\_  
 Signature

\_\_\_\_\_  
 Name of person taking consent

\_\_\_\_\_  
 Date

\_\_\_\_\_  
 Signature
